# Supplementary material for: An online gene expression assay for determining adjuvant therapy eligibility in patients with stage 2 or 3 colon cancer
Source: PubMed Central journal article supplement (PMC3008603; doi:10.1038/sj.bjc.6605970), 2010-11-30
Supplement: 6605970x1.pdf [file 6605970x1.pdf]

## ***An online gene expression assay for determining adjuvant therapy eligibility in patients with stage 2 or 3 colon cancer.***

### ***Supplementary Information***

#### ***Comparison of gene lists used for prediction of colon cancer recurrence:***

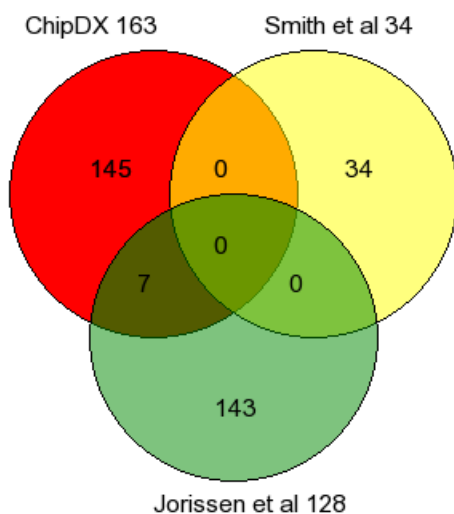

**Supplementary Figure 1:** Venn diagram of 3 gene expression signatures for colorectal cancer prognosis. 7 genes overlapping between ChipDX and Jorissen et al: AKAP12, DCBLD2, FN1, SPARC, SPP1, THBS2, VCAN.

### ***Analysis of gene expression data quality using the ChipDX Quality Module***

The ChipDX 'Quality Control & Normalization Module' is applied to measurements that are generated during chip pre-processing. This is carried out automatically on an individual GeneChip CEL file, prior to any predictive or diagnostic analysis. An easy-to-understand table and series of images are presented to the user which summarizes an extensive array of quality control data and alerts them to any data quality issues which may impact on the accuracy of further analyses.

The ChipDX Quality Module includes multiple assessments of data quality, designed to identify GeneChip hybridizations that are outside of the acceptable 'quality distribution' of samples used to develop the test. The quality assessments made are based on manufacturer recommendations and developer experience with diagnostic gene expression analysis. The metrics chosen are general measurements of microarray quality and not specific to any particular tumor type.

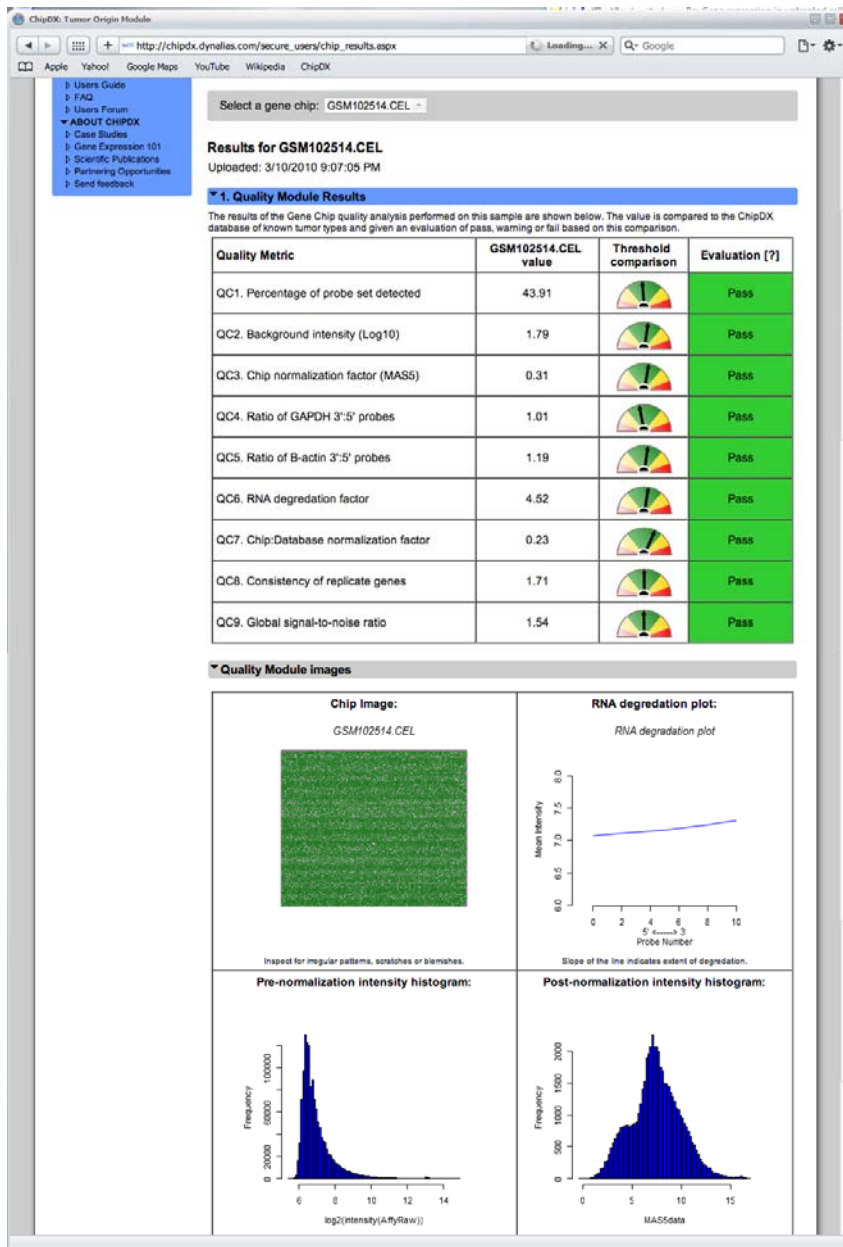

Supplementary Figure 2: Example output from the automated Quality Module, designed to ensure the gene expression data is suitable for diagnostic purposes.

To determine appropriate thresholds for the assessments, quality data were compiled from 2,774 Affymetrix U133 Plus 2.0 GeneChips. These were generated from 29 different tumor types which were processed and hybridized at multiple locations worldwide. Data were downloaded from the NCBI GEO repository and processed using the MAS5 algorithm. Normalized genomic profiles were median centered using the 100 internal housekeeping genes present on each chip. The median profile (as defined by expression of the 100 housekeeping genes) in the multi-tumor Expression Project for Oncology (ExpO) dataset was used as the reference profile for this process.

During data pre-processing and normalization, a number of Bioconductor R packages and custom R scripts are employed to assess nine quality variables or metrics on each GeneChip. The complete set of quality data generated during the process is stored in a Microsoft SQL Server 2008 relational database and the values are compared in real-time to predetermined thresholds. All data and results are linked to the users ChipDX account and date/time stamped to allow for future longitudinal and between-treatment-center quality studies.

### ***Tumor samples used to develop the ChipDX Quality Module***

Gene expression profiles from the following tumor types were compiled and analyzed in the ChipDX analysis system. Data were obtained in CEL file format. Tumors belonging to classes of less than 3 members are classified as 'other'.

**Supplementary Table 2:** Tumor types used to develop the ChipDX Quality Module

| <b>Tumor type</b> | <b>Number</b> | <b>Tumor type</b> | <b>Number</b> |
|-------------------|---------------|-------------------|---------------|
| B-cell Lymphoma   | 13            | Myometrium        | 3             |
| Bladder           | 18            | Other             | 19            |
| Breast            | 336           | Ovary             | 462           |
| Cervix            | 27            | Pancreas          | 14            |
| Colon             | 307           | Prostate          | 67            |
| Endometrium       | 136           | Rectum            | 28            |
| Esophagus         | 7             | Skin neoplasm     | 7             |
| Gastric           | 436           | Small Intestine   | 8             |
| Head & Neck       | 8             | Soft tissue       | 128           |
| Kidney            | 190           | Stomach           | 6             |
| Liver             | 120           | Testis            | 5             |

| Tumor type | Number | Tumor type | Number |
|------------|--------|------------|--------|
| Lung       | 237    | Thyroid    | 58     |
| Melanoma   | 130    | Vulva      | 5      |

### ***Threshold calculations***

To determine a range of acceptable values for each quality metric, without undue influence from far outlier values, we used the median value and interquartile range (IQR) of each metric. In this analysis we define outliers as values more than 1.5 times the IQR above or below the 75<sup>th</sup> or 25<sup>th</sup> percentile respectively. Far outliers are those more than 3 times the IQR above or below the 75<sup>th</sup> or 25<sup>th</sup> percentiles respectively. Thresholds were then set using the scheme shown in Figure 3.

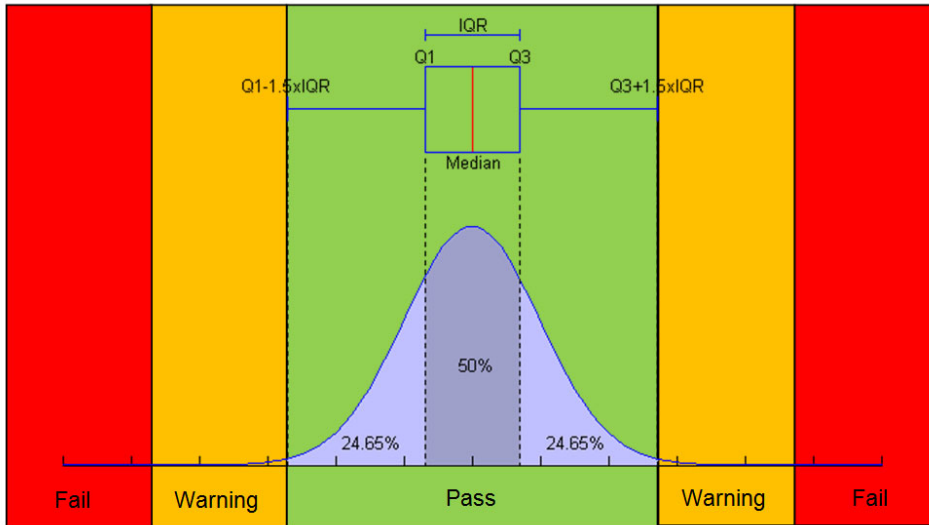

Supplementary Figure 3: Diagram of quality metric thresholds. The nine quality metrics used by the module each approximate a normal distribution after log transformation (where necessary). The thresholds are designed to identify individual measurements that are far outliers, i.e. more than 3\*IQR above or below the median value.

### ***Evaluation on real-world tumor datasets***

1,710 Affymetrix U133 Plus 2.0 GeneChip hybridizations of RNA from 10 types of primary tumor were analyzed by the Quality Module as part of the ChipDX Tumor Origin Module validation study. Of these,

1,665 (97%) passed all QC metrics and were used for further analysis. An additional set of 224 metastatic tumors were also analyzed, 94% of which satisfied all metrics.

These tumors were downloaded from NCBI GEO and are associated with peer-reviewed publications. As such it is important to note that any very poor quality hybridizations from each original series were most likely excluded as part of the quality control process employed in the respective study. Therefore the ‘real-world’ percentage of GeneChip hybridizations which pass all 9 metrics used by the Quality Module is likely to be lower.

In order to evaluate whether any tissue-type or location bias (grouping results by Asia-pacific, USA or Europe) existed in the samples excluded, a Kruskal Wallis test was performed. No significant association was observed between tissue type (n=10) or geographic origin and proportion of samples satisfying all components of the quality system (P=0.329 and P=0.429 respectively).

### ***163 probe set and Cox regression p-values.***

**Supplementary Table 1:** Affymetrix Probe IDs and gene annotation for the 163 probe prognostic signature. Cox-regression P-values for each gene are shown, in addition to the relationship between expression and poor prognosis (i.e. high risk).

| Affymetrix Probe ID | Name                                                                         | GB acc    | UGCluster | Symbol    | P-value (Cox regression, DFS) | Association between expression and poor prognosis |
|---------------------|------------------------------------------------------------------------------|-----------|-----------|-----------|-------------------------------|---------------------------------------------------|
| 1553954_at          | asparagine-linked glycosylation 14 homolog (S. cerevisiae)                   | BU682208  | Hs.408927 | ALG14     | 1.89E-03                      | -                                                 |
| 1554078_s_at        | DnaJ (Hsp40) homolog, subfamily A, member 3                                  | BC032100  | Hs.719223 | DNAJA3    | 8.51E-04                      | -                                                 |
| 1555832_s_at        | Kruppel-like factor 6                                                        | BU683415  | Hs.4055   | KLF6      | 5.44E-04                      | -                                                 |
| 1555950_a_at        | CD55 molecule, decay accelerating factor for complement (Cromer blood group) | CA448665  | Hs.126517 | CD55      | 2.32E-05                      | +                                                 |
| 1560089_at          | hypothetical LOC286208                                                       | AL833509  | Hs.693796 | LOC286208 | 1.72E-03                      | -                                                 |
| 1560587_s_at        | peroxiredoxin 5                                                              | AI718223  | Hs.502823 | PRDX5     | 8.98E-04                      | -                                                 |
| 1563796_s_at        | glutamyl-tRNA synthetase 2, mitochondrial (putative)                         | AK095998  | Hs.620541 | EARS2     | 1.51E-04                      | -                                                 |
| 200006_at           | Parkinson disease (autosomal recessive, early onset) 7                       | NM_007262 | Hs.419640 | PARK7     | 1.88E-03                      | -                                                 |
| 200632_s_at         | N-myc downstream regulated 1                                                 | NM_006096 | Hs.372914 | NDRG1     | 4.74E-05                      | +                                                 |
| 200665_s_at         | secreted protein, acidic, cysteine-rich (osteonectin)                        | NM_003118 | Hs.111779 | SPARC     | 9.49E-04                      | +                                                 |
| 200827_at           | procollagen-lysine 1, 2-oxoglutarate 5-dioxygenase 1                         | NM_000302 | Hs.75093  | PLOD1     | 1.79E-04                      | +                                                 |
| 200838_at           | cathepsin B                                                                  | NM_001908 | Hs.520898 | CTSB      | 1.77E-03                      | +                                                 |
| 200839_s_at         | cathepsin B                                                                  | NM_001908 | Hs.520898 | CTSB      | 1.95E-03                      | +                                                 |

| Affymetrix Probe ID | Name                                                                         | GB acc    | UGCluster | Symbol   | P-value (Cox regression n, DFS) | Association between expression and poor prognosis |
|---------------------|------------------------------------------------------------------------------|-----------|-----------|----------|---------------------------------|---------------------------------------------------|
| 200931_s_at         | vinculin                                                                     | NM_014000 | Hs.643896 | VCL      | 5.40E-04                        | -                                                 |
| 200983_x_at         | CD59 molecule, complement regulatory protein                                 | BF983379  | Hs.278573 | CD59     | 1.20E-03                        | -                                                 |
| 201012_at           | annexin A1                                                                   | NM_000700 | Hs.494173 | ANXA1    | 2.47E-04                        | +                                                 |
| 201141_at           | glycoprotein (transmembrane) nmb                                             | NM_002510 | Hs.190495 | GPNMB    | 1.82E-03                        | +                                                 |
| 201170_s_at         | basic helix-loop-helix family, member e40                                    | NM_003670 | Hs.719093 | BHLHE40  | 5.20E-06                        | +                                                 |
| 201185_at           | HtrA serine peptidase 1                                                      | NM_002775 | Hs.501280 | HTRA1    | 5.72E-04                        | +                                                 |
| 201261_x_at         | biglycan                                                                     | BC002416  | Hs.821    | BGN      | 1.47E-04                        | +                                                 |
| 201289_at           | cysteine-rich, angiogenic inducer, 61                                        | NM_001554 | Hs.8867   | CYR61    | 7.00E-04                        | +                                                 |
| 201323_at           | EBNA1 binding protein 2                                                      | NM_006824 | Hs.346868 | EBNA1BP2 | 1.65E-03                        | -                                                 |
| 201422_at           | interferon, gamma-inducible protein 30                                       | NM_006332 | Hs.14623  | IFI30    | 6.79E-04                        | +                                                 |
| 201426_s_at         | vimentin                                                                     | A1922599  | Hs.628678 | VIM      | 1.67E-03                        | +                                                 |
| 201578_at           | podocalyxin-like                                                             | NM_005397 | Hs.690098 | PODXL    | 1.27E-03                        | +                                                 |
| 201590_x_at         | annexin A2                                                                   | NM_004039 | Hs.511605 | ANXA2    | 5.77E-04                        | -                                                 |
| 201666_at           | TIMP metalloproteinase inhibitor 1                                           | NM_003254 | Hs.522632 | TIMP1    | 3.55E-04                        | +                                                 |
| 201925_s_at         | CD55 molecule, decay accelerating factor for complement (Cromer blood group) | NM_000574 | Hs.126517 | CD55     | 2.78E-05                        | +                                                 |
| 201926_s_at         | CD55 molecule, decay accelerating factor for complement (Cromer blood group) | BC001288  | Hs.126517 | CD55     | 2.68E-05                        | +                                                 |
| 201939_at           | polo-like kinase 2 (Drosophila)                                              | NM_006622 | Hs.398157 | PLK2     | 1.45E-03                        | +                                                 |
| 201951_at           | activated leukocyte cell adhesion molecule                                   | BF242905  | Hs.591293 | ALCAM    | 2.13E-04                        | +                                                 |
| 202068_s_at         | low density lipoprotein receptor                                             | NM_000527 | Hs.213289 | LDLR     | 1.02E-04                        | +                                                 |
| 202237_at           | nicotinamide N-methyltransferase                                             | NM_006169 | Hs.503911 | NNMT     | 1.80E-03                        | +                                                 |
| 202238_s_at         | nicotinamide N-methyltransferase                                             | NM_006169 | Hs.503911 | NNMT     | 1.80E-03                        | +                                                 |
| 202419_at           | 3-ketodihydrospingosine reductase                                            | NM_002035 | Hs.74050  | KDSR     | 4.95E-04                        | +                                                 |
| 202457_s_at         | protein phosphatase 3 (formerly 2B), catalytic subunit, alpha isoform        | AA911231  | Hs.435512 | PPP3CA   | 1.90E-03                        | +                                                 |
| 202478_at           | tribbles homolog 2 (Drosophila)                                              | NM_021643 | Hs.467751 | TRIB2    | 7.90E-04                        | +                                                 |
| 202839_s_at         | NADH dehydrogenase (ubiquinone) 1 beta subcomplex, 7, 18kDa                  | NM_004146 | Hs.532853 | NDUFB7   | 6.09E-04                        | -                                                 |
| 202887_s_at         | DNA-damage-inducible transcript 4                                            | NM_019058 | Hs.523012 | DDIT4    | 8.94E-05                        | +                                                 |
| 202904_s_at         | LSM5 homolog, U6 small nuclear RNA associated (S. cerevisiae)                | NM_012322 | Hs.424908 | LSM5     | 1.97E-03                        | -                                                 |
| 202939_at           | zinc metalloproteinase (STE24 homolog, S. cerevisiae)                        | NM_005857 | Hs.132642 | ZMPSTE24 | 1.79E-03                        | -                                                 |
| 202949_s_at         | four and a half LIM domains 2                                                | NM_001450 | Hs.443687 | FHL2     | 2.82E-04                        | -                                                 |
| 203072_at           | myosin IE                                                                    | NM_004998 | Hs.654506 | MYO1E    | 8.77E-04                        | +                                                 |
| 203083_at           | thrombospondin 2                                                             | NM_003247 | Hs.371147 | THBS2    | 1.23E-04                        | +                                                 |
| 203382_s_at         | apolipoprotein E                                                             | NM_000041 | Hs.654439 | APOE     | 4.30E-04                        | +                                                 |
| 203476_at           | trophoblast glycoprotein                                                     | NM_006670 | Hs.82128  | TPBG     | 1.50E-04                        | +                                                 |
| 203895_at           | phospholipase C, beta 4                                                      | AL535113  | Hs.472101 | PLCB4    | 6.44E-04                        | -                                                 |
| 204264_at           | carnitine palmitoyltransferase 2                                             | NM_000098 | Hs.713535 | CPT2     | 9.97E-04                        | -                                                 |
| 204472_at           | GTP binding protein overexpressed in skeletal muscle                         | NM_005261 | Hs.654463 | GEM      | 4.33E-04                        | +                                                 |
| 204620_s_at         | versican                                                                     | NM_004385 | Hs.643801 | VCAN     | 5.28E-04                        | +                                                 |
| 204679_at           | potassium channel, subfamily K, member 1                                     | NM_002245 | Hs.208544 | KCNK1    | 1.58E-03                        | +                                                 |
| 205677_s_at         | deleted in lymphocytic leukemia 1 (non-protein coding)                       | NM_005887 | Hs.591229 | DLEU1    | 7.15E-04                        | -                                                 |
| 205963_s_at         | DnaJ (Hsp40) homolog, subfamily A, member 3                                  | NM_005147 | Hs.719223 | DNAJA3   | 4.48E-04                        | -                                                 |
| 207543_s_at         | prolyl 4-hydroxylase, alpha polypeptide I                                    | NM_000917 | Hs.500047 | P4HA1    | 1.62E-05                        | +                                                 |

| Affymetrix Probe ID | Name                                                                                                 | GB acc    | UGCluster | Symbol  | P-value (Cox regression, DFS) | Association between expression and poor prognosis |
|---------------------|------------------------------------------------------------------------------------------------------|-----------|-----------|---------|-------------------------------|---------------------------------------------------|
| 207574_s_at         | growth arrest and DNA-damage-inducible, beta                                                         | NM_015675 | Hs.110571 | GADD45B | 4.19E-04                      | +                                                 |
| 208891_at           | dual specificity phosphatase 6                                                                       | BC003143  | Hs.298654 | DUSP6   | 5.66E-04                      | +                                                 |
| 208892_s_at         | dual specificity phosphatase 6                                                                       | BC003143  | Hs.298654 | DUSP6   | 1.70E-03                      | +                                                 |
| 208893_s_at         | dual specificity phosphatase 6                                                                       | BC005047  | Hs.298654 | DUSP6   | 1.45E-03                      | +                                                 |
| 208918_s_at         | NAD kinase                                                                                           | AI334128  | Hs.654792 | NADK    | 7.87E-04                      | -                                                 |
| 208961_s_at         | Kruppel-like factor 6                                                                                | AB017493  | Hs.4055   | KLF6    | 1.75E-03                      | +                                                 |
| 209043_at           | 3'-phosphoadenosine 5'-phosphosulfate synthase 1                                                     | AF033026  | Hs.368610 | PAPSS1  | 4.70E-04                      | -                                                 |
| 209101_at           | connective tissue growth factor                                                                      | M92934    | Hs.591346 | CTGF    | 8.53E-05                      | +                                                 |
| 209184_s_at         | insulin receptor substrate 2                                                                         | BF700086  | Hs.442344 | IRS2    | 8.39E-04                      | -                                                 |
| 209185_s_at         | insulin receptor substrate 2                                                                         | AF073310  | Hs.442344 | IRS2    | 5.24E-04                      | -                                                 |
| 209193_at           | pim-1 oncogene                                                                                       | M24779    | Hs.81170  | PIM1    | 7.01E-04                      | +                                                 |
| 209345_s_at         | phosphatidylinositol 4-kinase type 2 alpha                                                           | AL561930  | Hs.25300  | PI4K2A  | 1.53E-03                      | +                                                 |
| 209386_at           | transmembrane 4 L six family member 1                                                                | AI346835  | Hs.715499 | TM4SF1  | 2.74E-05                      | -                                                 |
| 209387_s_at         | transmembrane 4 L six family member 1                                                                | M90657    | Hs.715499 | TM4SF1  | 1.10E-03                      | +                                                 |
| 209457_at           | dual specificity phosphatase 5                                                                       | U16996    | Hs.2128   | DUSP5   | 1.71E-03                      | +                                                 |
| 209545_s_at         | receptor-interacting serine-threonine kinase 2                                                       | AF064824  | Hs.103755 | RIPK2   | 1.57E-03                      | +                                                 |
| 209624_s_at         | methylcrotonoyl-Coenzyme A carboxylase 2 (beta)                                                      | AB050049  | Hs.604789 | MCCC2   | 1.21E-03                      | -                                                 |
| 209711_at           | solute carrier family 35 (UDP-glucuronic acid/UDP-N-acetylgalactosamine dual transporter), member D1 | N80922    | Hs.213642 | SLC35D1 | 1.70E-04                      | -                                                 |
| 209875_s_at         | secreted phosphoprotein 1                                                                            | M83248    | Hs.313    | SPP1    | 1.88E-04                      | +                                                 |
| 210095_s_at         | insulin-like growth factor binding protein 3                                                         | M31159    | Hs.450230 | IGFBP3  | 6.96E-04                      | +                                                 |
| 210275_s_at         | zinc finger, AN1-type domain 5                                                                       | AF062347  | Hs.406096 | ZFAND5  | 6.18E-04                      | -                                                 |
| 210427_x_at         | annexin A2                                                                                           | BC001388  | Hs.511605 | ANXA2   | 1.57E-03                      | -                                                 |
| 210495_x_at         | fibronectin 1                                                                                        | AF130095  | Hs.203717 | FN1     | 4.08E-05                      | +                                                 |
| 210512_s_at         | vascular endothelial growth factor A                                                                 | AF022375  | Hs.73793  | VEGFA   | 3.54E-05                      | -                                                 |
| 210517_s_at         | A kinase (PRKA) anchor protein 12                                                                    | AB003476  | Hs.371240 | AKAP12  | 1.99E-04                      | +                                                 |
| 210592_s_at         | spermidine/spermine N1-acetyltransferase 1                                                           | M55580    | Hs.28491  | SAT1    | 7.13E-04                      | -                                                 |
| 210652_s_at         | tetratricopeptide repeat domain 39A                                                                  | BC004399  | Hs.112949 | TTC39A  | 1.64E-03                      | -                                                 |
| 210845_s_at         | plasminogen activator, urokinase receptor                                                            | U08839    | Hs.466871 | PLAUR   | 1.20E-04                      | +                                                 |
| 211074_at           | folate receptor 1 (adult)                                                                            | AF000381  | Hs.73769  | FOLR1   | 1.81E-05                      | -                                                 |
| 211719_x_at         | fibronectin 1                                                                                        | BC005858  | Hs.203717 | FN1     | 1.91E-04                      | +                                                 |
| 211924_s_at         | plasminogen activator, urokinase receptor                                                            | AY029180  | Hs.466871 | PLAUR   | 1.10E-03                      | +                                                 |
| 211928_at           | dynein, cytoplasmic 1, heavy chain 1                                                                 | AB002323  | Hs.649497 | DYNC1H1 | 1.01E-03                      | +                                                 |
| 211988_at           | SWI/SNF related, matrix associated, actin dependent regulator of chromatin, subfamily e, member 1    | BG289800  | Hs.696086 | SMARCE1 | 1.51E-03                      | -                                                 |
| 212013_at           | peroxidase homolog (Drosophila)                                                                      | D86983    | Hs.332197 | PXDN    | 2.74E-04                      | +                                                 |
| 212143_s_at         | insulin-like growth factor binding protein 3                                                         | BF340228  | Hs.450230 | IGFBP3  | 1.82E-03                      | +                                                 |
| 212171_x_at         | vascular endothelial growth factor A                                                                 | H95344    | Hs.73793  | VEGFA   | 8.33E-04                      | -                                                 |
| 212463_at           | CD59 molecule, complement regulatory protein                                                         | BE379006  | Hs.278573 | CD59    | 1.02E-03                      | -                                                 |
| 212464_s_at         | fibronectin 1                                                                                        | X02761    | Hs.203717 | FN1     | 3.36E-05                      | +                                                 |
| 212501_at           | CCAAT/enhancer binding protein (C/EBP), beta                                                         | AL564683  | Hs.517106 | CEBPB   | 8.65E-04                      | -                                                 |
| 212632_at           | syntaxin 7                                                                                           | N32035    | Hs.593148 | STX7    | 8.03E-04                      | +                                                 |
| 212884_x_at         | apolipoprotein E                                                                                     | AI358867  | Hs.654439 | APOE    | 2.19E-04                      | +                                                 |

| Affymetrix Probe ID | Name                                                        | GB acc    | UGCluster | Symbol    | P-value (Cox regression, DFS) | Association between expression and poor prognosis |
|---------------------|-------------------------------------------------------------|-----------|-----------|-----------|-------------------------------|---------------------------------------------------|
| 213274_s_at         | cathepsin B                                                 | AA020826  | Hs.520898 | CTSB      | 1.77E-03                      | +                                                 |
| 213503_x_at         | annexin A2                                                  | BE908217  | Hs.511605 | ANXA2     | 7.82E-04                      | +                                                 |
| 213905_x_at         | biglycan                                                    | AA845258  | Hs.821    | BGN       | 2.69E-04                      | +                                                 |
| 214581_x_at         | tumor necrosis factor receptor superfamily, member 21       | BE568134  | Hs.443577 | TNFRSF21  | 1.24E-03                      | +                                                 |
| 214620_x_at         | peptidylglycine alpha-amidating monooxygenase               | BF038548  | Hs.369430 | PAM       | 6.78E-04                      | +                                                 |
| 214866_at           | plasminogen activator, urokinase receptor                   | X74039    | Hs.466871 | PLAUR     | 4.11E-04                      | +                                                 |
| 215033_at           | transmembrane 4 L six family member 1                       | AI189753  | Hs.715499 | TM4SF1    | 2.05E-05                      | -                                                 |
| 215034_s_at         | transmembrane 4 L six family member 1                       | AI189753  | Hs.715499 | TM4SF1    | 2.05E-05                      | +                                                 |
| 215792_s_at         | DnaJ (Hsp40) homolog, subfamily C, member 11                | AL109978  | Hs.462640 | DNAJC11   | 1.81E-03                      | -                                                 |
| 216392_s_at         | SEC23 interacting protein                                   | AK021846  | Hs.435004 | SEC23IP   | 5.52E-04                      | +                                                 |
| 216442_x_at         | fibronectin 1                                               | AK026737  | Hs.203717 | FN1       | 2.37E-05                      | +                                                 |
| 217762_s_at         | RAB31, member RAS oncogene family                           | BE789881  | Hs.714730 | RAB31     | 1.32E-03                      | +                                                 |
| 217773_s_at         | NADH dehydrogenase (ubiquinone) 1 alpha subcomplex, 4, 9kDa | NM_002489 | Hs.50098  | NDUFA4    | 1.86E-05                      | -                                                 |
| 217996_at           | pleckstrin homology-like domain, family A, member 1         | AA576961  | Hs.602085 | PHLDA1    | 4.74E-04                      | +                                                 |
| 218213_s_at         | chromosome 11 open reading frame 10                         | NM_014206 | Hs.437779 | C11orf10  | 1.63E-03                      | -                                                 |
| 218698_at           | APAF1 interacting protein                                   | NM_015957 | Hs.447794 | APIP      | 1.77E-03                      | -                                                 |
| 218856_at           | tumor necrosis factor receptor superfamily, member 21       | NM_016629 | Hs.443577 | TNFRSF21  | 8.15E-04                      | +                                                 |
| 218902_at           | Notch homolog 1, translocation-associated (Drosophila)      | NM_017617 | Hs.495473 | NOTCH1    | 5.32E-04                      | -                                                 |
| 219038_at           | MORC family CW-type zinc finger 4                           | NM_024657 | Hs.496544 | MORC4     | 6.74E-04                      | +                                                 |
| 219206_x_at         | transmembrane BAX inhibitor motif containing 4              | NM_016056 | Hs.505934 | TMBIM4    | 1.51E-03                      | -                                                 |
| 219539_at           | gem (nuclear organelle) associated protein 6                | NM_024775 | Hs.143818 | GEMIN6    | 1.92E-03                      | -                                                 |
| 221419_s_at         |                                                             | NM_013307 |           |           | 5.04E-04                      | -                                                 |
| 221479_s_at         | BCL2/adenovirus E1B 19kDa interacting protein 3-like        | AF060922  | Hs.131226 | BNIP3L    | 2.06E-04                      | +                                                 |
| 221563_at           | dual specificity phosphatase 10                             | N36770    | Hs.497822 | DUSP10    | 7.92E-04                      | +                                                 |
| 221648_s_at         |                                                             | AK025651  |           |           | 1.07E-03                      | -                                                 |
| 221656_s_at         | Rho guanine nucleotide exchange factor (GEF) 10-like        | BC003073  | Hs.443460 | ARHGEF10L | 1.20E-03                      | -                                                 |
| 221730_at           | collagen, type V, alpha 2                                   | NM_000393 | Hs.445827 | COL5A2    | 1.86E-03                      | +                                                 |
| 221731_x_at         | versican                                                    | BF218922  | Hs.643801 | VCAN      | 1.88E-03                      | +                                                 |
| 221745_at           | DDB1 and CUL4 associated factor 7                           | BE538424  | Hs.410596 | DCAF7     | 1.75E-03                      | -                                                 |
| 222421_at           | ubiquitin-conjugating enzyme E2H (UBC8 homolog, yeast)      | BF435617  | Hs.643548 | UBE2H     | 1.66E-03                      | -                                                 |
| 222994_at           | peroxiredoxin 5                                             | AF197952  | Hs.502823 | PRDX5     | 1.02E-03                      | -                                                 |
| 223003_at           | chromosome 19 open reading frame 43                         | AF061732  | Hs.515155 | C19orf43  | 1.67E-03                      | -                                                 |
| 223122_s_at         | secreted frizzled-related protein 2                         | AF311912  | Hs.481022 | SFRP2     | 3.15E-05                      | +                                                 |
| 223163_s_at         | zinc finger, C3HC-type containing 1                         | BC000190  | Hs.194157 | ZC3HC1    | 1.94E-03                      | -                                                 |
| 223312_at           | chromosome 2 open reading frame 7                           | BC005069  | Hs.61268  | C2orf7    | 4.95E-05                      | -                                                 |
| 223454_at           | chemokine (C-X-C motif) ligand 16                           | AF275260  | Hs.711652 | CXCL16    | 8.98E-04                      | +                                                 |
| 223455_at           | trichoplein, keratin filament binding                       | BG493862  | Hs.410924 | TCHP      | 3.80E-04                      | -                                                 |
| 224602_at           | chromosome 4 open reading frame 3                           | BF244081  | Hs.701808 | C4orf3    | 1.61E-03                      | +                                                 |
| 224606_at           | Kruppel-like factor 6                                       | BG250721  | Hs.4055   | KLF6      | 1.91E-04                      | -                                                 |
| 224657_at           | ERBB receptor feedback inhibitor 1                          | AL034417  | Hs.605445 | ERRFI1    | 1.29E-03                      | +                                                 |



| Affymetrix Probe ID | Name                                                                      | GB acc   | UGCluster | Symbol    | P-value (Cox regression, DFS) | Association between expression and poor prognosis |
|---------------------|---------------------------------------------------------------------------|----------|-----------|-----------|-------------------------------|---------------------------------------------------|
| 224777_s_at         | platelet-activating factor acetylhydrolase, isoform Ib, subunit 2 (30kDa) | BG386322 | Hs.718419 | PAFAH1B2  | 1.81E-03                      | -                                                 |
| 224806_at           | tripartite motif-containing 25                                            | BE563152 | Hs.528952 | TRIM25    | 1.54E-04                      | -                                                 |
| 224890_s_at         | chromosome 7 open reading frame 59                                        | BE727643 | Hs.406520 | C7orf59   | 1.32E-03                      | -                                                 |
| 224911_s_at         | discoidin, CUB and LCCL domain containing 2                               | AA722799 | Hs.203691 | DCBLD2    | 1.74E-03                      | +                                                 |
| 225010_at           | coiled-coil domain containing 6                                           | AK024913 | Hs.591360 | CCDC6     | 1.49E-03                      | -                                                 |
| 225011_at           | protein kinase, cAMP-dependent, regulatory, type II, alpha                | AK026351 | Hs.631923 | PRKAR2A   | 4.84E-04                      | -                                                 |
| 225337_at           | abhydrolase domain containing 2                                           | AI346910 | Hs.122337 | ABHD2     | 1.55E-03                      | +                                                 |
| 225494_at           | dynein, light chain, LC8-type 2                                           | BG478726 | Hs.514368 | DYNLL2    | 1.17E-04                      | -                                                 |
| 225670_at           | family with sequence similarity 173, member B                             | AI384017 | Hs.481569 | FAM173B   | 8.18E-04                      | -                                                 |
| 225750_at           |                                                                           | BE966748 |           |           | 6.24E-04                      | -                                                 |
| 226041_at           | N-acyl phosphatidylethanolamine phospholipase D                           | BF382393 | Hs.324271 | NAPEPLD   | 1.87E-03                      | -                                                 |
| 226594_at           |                                                                           | AA528157 | Hs.655070 |           | 1.12E-03                      | -                                                 |
| 226648_at           | hypoxia inducible factor 1, alpha subunit inhibitor                       | AI769745 | Hs.500788 | HIF1AN    | 1.93E-03                      | -                                                 |
| 226727_at           | CDGSH iron sulfur domain 3                                                | BG171264 | Hs.713595 | CISD3     | 3.53E-04                      | -                                                 |
| 226987_at           | RNA binding motif protein 15B                                             | W68720   | Hs.118738 | RBM15B    | 1.48E-03                      | -                                                 |
| 227143_s_at         | BH3 interacting domain death agonist                                      | AA706658 | Hs.591054 | BID       | 1.30E-03                      | -                                                 |
| 227338_at           | hypothetical gene supported by BC066916                                   | H99038   | Hs.535002 | LOC440983 | 7.99E-04                      | -                                                 |
| 227735_s_at         |                                                                           | AA553959 | Hs.298713 | C10orf99  | 9.29E-04                      | -                                                 |
| 227736_at           | chromosome 10 open reading frame 99                                       | AA553959 | Hs.298713 | C10orf99  | 2.00E-03                      | -                                                 |
| 227961_at           | cathepsin B                                                               | AA130998 | Hs.520898 | CTSB      | 1.94E-03                      | +                                                 |
| 229676_at           | mitochondrial poly(A) polymerase                                          | AA400998 | Hs.173946 | MTPAP     | 2.41E-05                      | -                                                 |
| 231576_at           |                                                                           | AA829940 | Hs.713786 |           | 9.56E-05                      | -                                                 |
| 234983_at           |                                                                           | BE893995 | Hs.120170 |           | 1.10E-04                      | -                                                 |
| 241355_at           | hairless homolog (mouse)                                                  | BF528433 | Hs.272367 | HR        | 1.20E-03                      | -                                                 |
| 242648_at           | kelch-like 8 (Drosophila)                                                 | BE858995 | Hs.106601 | KLHL8     | 1.59E-03                      | -                                                 |
| 35156_at            | R3H domain and coiled-coil containing 1                                   | AL050297 | Hs.458644 | R3HCC1    | 1.37E-03                      | -                                                 |
| 36711_at            | v-maf musculoaponeurotic fibrosarcoma oncogene homolog F (avian)          | AL021977 | Hs.517617 | MAFF      | 1.77E-03                      | +                                                 |
| 58780_s_at          | hypothetical protein FLJ10357                                             | R42449   | Hs.35125  | FLJ10357  | 7.64E-04                      | -                                                 |
